# Supplementary material for: Association between comorbidities associated with diabetes and higher-level functional status in older patients with type 2 diabetes mellitus: a cross sectional study
Source: PubMed Central journal article supplement (PMC11377677; doi:10.1007/s41999-024-00937-8), 2024-02-10
Supplement: 41999_2024_937_MOESM1_ESM.pdf [file 41999_2024_937_MOESM1_ESM.pdf]

## **Supplementary Information**

The relationship between other comorbidities associated with diabetes (diabetic peripheral neuropathy, sarcopenia, stroke, heart disease, and arthritis) and higher-level functional status.

## **Article title**

Association between comorbidities associated with diabetes and higher-level functional status in older patients with type 2 diabetes mellitus – A cross sectional study

## **Journal name**

*European Geriatric Medicine*

## **Author names and affiliations**

Takuro Shoji, PT, MS <sup>1,2</sup>, Kenta Kogure, PT <sup>1</sup>, Nagisa Toda, PT <sup>1</sup>, Mariko Hakoshima, MD <sup>3</sup>, Hisayuki Katsuyama, MD, PhD <sup>3</sup>, Hidekatsu Yanai, MD, PhD <sup>3</sup>, Satoshi Tokunaga, MS <sup>2</sup>, Korin Tateoka, MS <sup>4</sup>, Taishi Tsuji, PhD <sup>5</sup>, Tomohiro Okura, PhD <sup>5</sup>

<sup>1</sup> Department of Rehabilitation Medicine, National Center for Global Health and Medicine Kohnodai Hospital, Ichikawa, Chiba, Japan

<sup>2</sup> Graduate School of Comprehensive Human Sciences, Doctoral Program in Public Health, University of Tsukuba, Tuskuba, Ibaraki, Japan

<sup>3</sup> Department of Diabetes, Endocrinology, and Metabolism, National Center for Global Health and Medicine, Kohnodai Hospital, Ichikawa, Japan

<sup>4</sup> Graduate School of Comprehensive Human Sciences, Doctoral Program in Physical Education, Health and Sport Sciences, University of Tsukuba, Tuskuba, Ibaraki, Japan

<sup>5</sup> Institute of Health and Sport Sciences, University of Tsukuba, Tuskuba, Ibaraki, Japan

## **Corresponding author**

Takuro Shoji, PT, MS, Department of Rehabilitation Medicine, National Center for Global Health and Medicine Kohnodai Hospital, Kohnodai 1-7-1, Ichikawa, Chiba 272-8516, Japan.

Phone number: +81 47-372-3501

Fax number: +81 47-375-4746

Email address: [pt.shoji@hospk.ncgm.go.jp](mailto:pt.shoji@hospk.ncgm.go.jp)

**Supplementary Table 1. Prevalence ratio (95% confidence interval) of other comorbidities for malfunction status of TMIG-IC: determined by Poisson regression analysis**

| Variables              | <i>n</i> | Prevalence of TMIG-IC<br>disability, <i>n</i> (%) | Crude model      | Model 1          | Model 2          |
|------------------------|----------|---------------------------------------------------|------------------|------------------|------------------|
|                        |          |                                                   | PR (95% CI)      | PR (95% CI)      | PR (95% CI)      |
| Arthritis              | 10       | 3 (30.0)                                          | 1.22 (0.46–3.25) | 1.27 (0.54–2.96) | 0.90 (0.35–2.36) |
| Diabetic neuropathy    | 71       | 15 (21.1)                                         | 0.78 (0.46–1.34) | 0.79 (0.51–1.24) | 0.90 (0.59–1.39) |
| Stroke                 | 19       | 5 (26.3)                                          | 1.07 (0.48–2.36) | 1.10 (0.60–2.04) | 0.78 (0.41–1.49) |
| Cardiovascular disease | 25       | 9 (36.0)                                          | 1.55 (0.86–2.79) | 0.86 (0.50–1.49) | 0.84 (0.50–1.41) |
| Sarcopenia             | 18       | 6 (33.3)                                          | 1.38 (0.68–2.79) | 1.28 (0.70–2.35) | 1.00 (0.47–2.13) |

TMIG-IC, Tokyo Metropolitan Institute Gerontology Index of Competence; PR, prevalence ratio; CI, confidence interval.

Model 1: adjusted for propensity score (including age, gender, use of insulin, HbA1c, BMI, self-rated health, smoking status, physical activity level, academic history, economic condition, living status, other comorbidities). Model 2: Model 1 + score of Lubben Social Network Scale-6

**Supplementary Table 2. Prevalence ratio (95% confidence interval) of other comorbidities for malfunction status of IADL: determined by Poisson regression analysis**

| Variables              | <i>n</i> | Prevalence of IADL<br>disability, <i>n</i> (%) | Crude model      | Model 1          | Model 2          |
|------------------------|----------|------------------------------------------------|------------------|------------------|------------------|
|                        |          |                                                | PR (95% CI)      | PR (95% CI)      | PR (95% CI)      |
| Arthritis              | 10       | 2 (20.0)                                       | 1.50 (0.41–5.48) | 1.65 (0.71–3.85) | 1.47 (0.63–3.47) |
| Diabetic neuropathy    | 71       | 8 (11.3)                                       | 0.75 (0.35–1.63) | 0.77 (0.39–1.51) | 0.74 (0.37–1.48) |
| Stroke                 | 19       | 4 (21.1)                                       | 1.64 (0.63–4.24) | 1.18 (0.43–3.25) | 1.06 (0.39–2.91) |
| Cardiovascular disease | 25       | 4 (16.0)                                       | 1.20 (0.45–3.19) | 1.13 (0.51–2.50) | 1.08 (0.51–2.27) |
| Sarcopenia             | 18       | 3 (16.7)                                       | 1.24 (0.42–3.73) | 1.38 (0.61–3.15) | 1.44 (0.58–3.55) |

IADL, Instrumental activities of daily living; PR, prevalence ratio; CI, confidence interval.

Model 1: adjusted for propensity score (including age, gender, use of insulin, HbA1c, BMI, self-rated health, smoking status, physical activity level, academic history, economic condition, living status, other comorbidities). Model 2: Model 1 + score of Lubben Social Network Scale-6

**Supplementary Table 3. Prevalence ratio (95% confidence interval) of other comorbidities for malfunction status of intellectual activity: determined by Poisson regression analysis**

| Variables              | <i>n</i> | Prevalence of intellectual activity disability, <i>n</i> (%) | Crude model        | Model 1            | Model 2            |
|------------------------|----------|--------------------------------------------------------------|--------------------|--------------------|--------------------|
|                        |          |                                                              | PR (95% CI)        | PR (95% CI)        | PR (95% CI)        |
| Arthritis              | 10       | 3 (30.0)                                                     | 0.55 (0.21 – 1.44) | 0.52 (0.25 – 1.09) | 0.50 (0.24 – 1.02) |
| Diabetic neuropathy    | 71       | 39 (54.9)                                                    | 1.06 (0.81 – 1.38) | 1.03 (0.82 – 1.30) | 1.03 (0.82 – 1.30) |
| Stroke                 | 19       | 12 (63.2)                                                    | 1.22 (0.84 – 1.76) | 1.12 (0.78 – 1.61) | 1.08 (0.75 – 1.54) |
| Cardiovascular disease | 25       | 15 (60.0)                                                    | 1.15 (0.81 – 1.64) | 0.92 (0.62 – 1.36) | 0.91 (0.63 – 1.33) |
| Sarcopenia             | 18       | 6 (33.3)                                                     | 0.60 (0.31 – 1.17) | 0.69 (0.39 – 1.21) | 0.67 (0.38 – 1.17) |

PR, prevalence ratio; CI, confidence interval.

Model 1: adjusted for propensity score (including age, gender, use of insulin, HbA1c, BMI, self-rated health, smoking status, physical activity level, academic history, economic condition, living status, other comorbidities). Model 2: Model 1 + score of Lubben Social Network Scale-6

**Supplementary Table 4. Prevalence ratio (95% confidence interval) of other comorbidities for malfunction status of social role: determined by Poisson regression analysis**

| Variables              | <i>n</i> | Prevalence of social role disability, <i>n</i> (%) | Crude model        | Model 1            | Model 2            |
|------------------------|----------|----------------------------------------------------|--------------------|--------------------|--------------------|
|                        |          |                                                    | PR (95% CI)        | PR (95% CI)        | PR (95% CI)        |
| Arthritis              | 10       | 5 (50.0)                                           | 0.77 (0.41 – 1.45) | 0.77 (0.42 – 1.39) | 0.69 (0.38 – 1.23) |
| Diabetic neuropathy    | 71       | 46 (64.8)                                          | 1.02 (0.82 – 1.27) | 1.01 (0.81 – 1.25) | 1.02 (0.84 – 1.24) |
| Stroke                 | 19       | 12 (63.2)                                          | 0.99 (0.69 – 1.41) | 0.97 (0.67 – 1.40) | 0.80 (0.57 – 1.12) |
| Cardiovascular disease | 25       | 15 (60.0)                                          | 0.93 (0.66 – 1.31) | 0.78 (0.54 – 1.13) | 0.78 (0.58 – 1.05) |
| Sarcopenia             | 18       | 12 (66.7)                                          | 1.04 (0.74 – 1.47) | 1.05 (0.74 – 1.47) | 1.03 (0.72 – 1.49) |

PR, prevalence ratio; CI, confidence interval.

Model 1: adjusted for propensity score (including age, gender, use of insulin, HbA1c, BMI, self-rated health, smoking status, physical activity level, academic history, economic condition, living status, other comorbidities). Model 2: Model 1 + score of Lubben Social Network Scale-6
